# Supplementary material for: Point of care biliary ultrasound in the emergency department (BUSED) predicts final surgical management decisions
Source: HighWire-hosted journal article supplement (doi:10.1136/tsaco-2022-000944), 2022-09-01
Supplement: tsaco-2022-000944supp001_data_supplement.pdf [file tsaco-2022-000944supp001_data_supplement.pdf]

## Biliary POCUS predicts surgical management decisions

Hilsden et al.

Trauma Surgery and Acute Care Open

Patient with abdominal pain

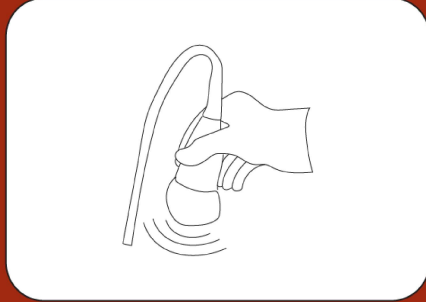

ED POCUS Positive for biliary disease

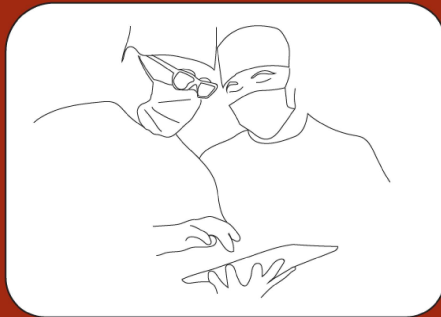

All patients sent for  
Radiology Department  
Ultrasound

Radiology department ultrasound  
changed management in fewer than  
10% of patients compared to POCUS

TRAUMA  
SURGERY  
& ACUTE  
CARE OPEN

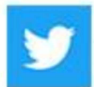

@TSACO\_AAST
